# Supplementary material for: Endothelial injury, F-actin and vitamin D binding protein after hematopoietic stem cell transplant and association with clinical outcomes
Source: PubMed Central journal article supplement — Haematologica. 2020 Apr 2;106(5):1321–9. doi: 10.3324/haematol.2019.233478 (PMC8094097; doi:10.3324/haematol.2019.233478), 2020-04-02
Supplement: 2019_233478-DisclosuresContributions.pdf [file 2019_233478-DisclosuresContributions.pdf]

Haematologica  
HAEMATOL/2019/233478  
Version 4

Endothelial injury, F-actin and vitamin-D binding protein after  
hematopoietic stem cell transplant and association with clinical  
outcomes

Nathan Luebbering, Sheyar Abdullah, Dana Lounder, Adam Lane,  
Nikhil Dole, Jeremy Rubinstein, Martin Hewison, Nicholas Gloude,  
Sonata Jodele, Kitty M.R. Perentesis, Kelly Lake, Bridget Litts,  
Alexandra Duell, Christopher E. Dandoy, and Stella M. Davies

Disclosures: SMD has served as a consultant for Novartis and has received research support from Prolacta and Alexion pharmaceuticals. SJ has received research support from Alexion pharmaceuticals. NL and SMD are holders of a provisional US patent regarding vitamin D binding protein as a modifier of transplant outcomes.

Contributions: NL, SA, DL, ND, JR, NG, EMRP, KL,BL,AD performed experiments and reviewed and approved the manuscript. AL performed statistical analyses. NL, MH, SJ, CED and SMD designed experiments, analyzed and interpreted data and reviewed and approved the manuscript.
